# Supplementary material for: The effect of microbial community in the self-induced anaerobic fermentation on the aroma precursor development of geothermal coffee
Source: Royal Society of Chemistry journal article supplement (doi:10.1039/d5fb00673b), 2025-12-23
Supplement: d5fb00673b1.pdf [file d5fb00673b1.pdf]

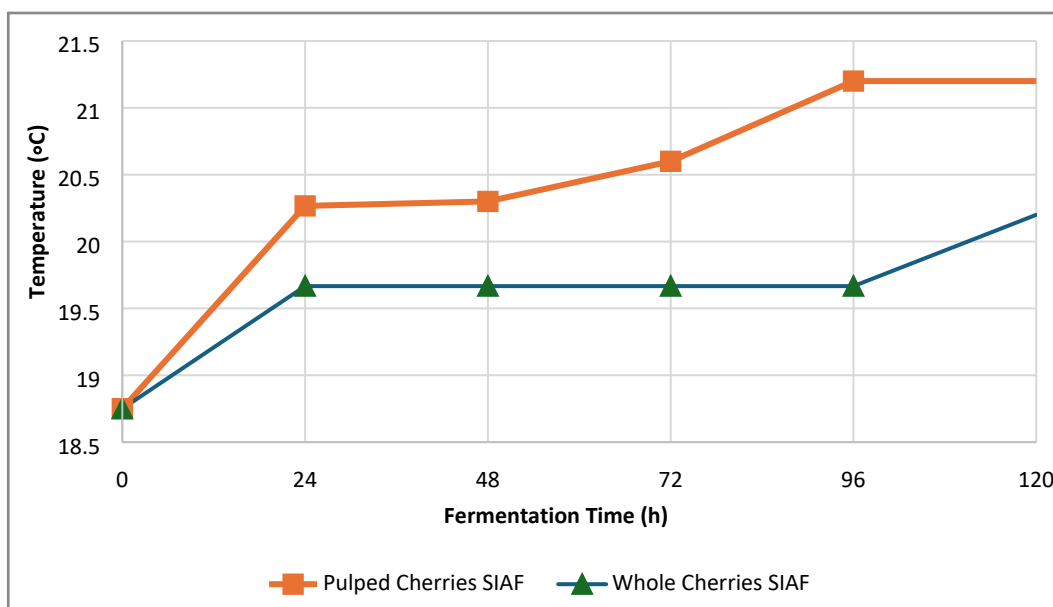

Supplement Figure 1 Temperature of 5 days Self-Induced Anaerobic Fermentation of Whole and Pulped Cherries SIAF

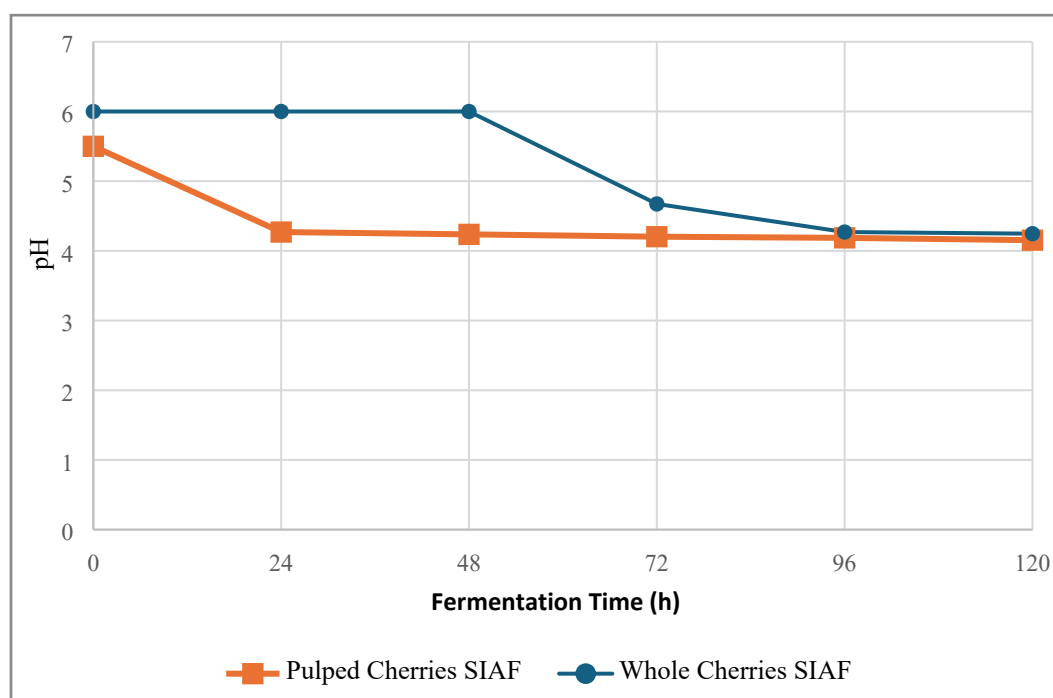

Supplement Figure 2 pH of 5 days Self-Induced Anaerobic Fermentation of Whole and Pulped Cherries SIAF

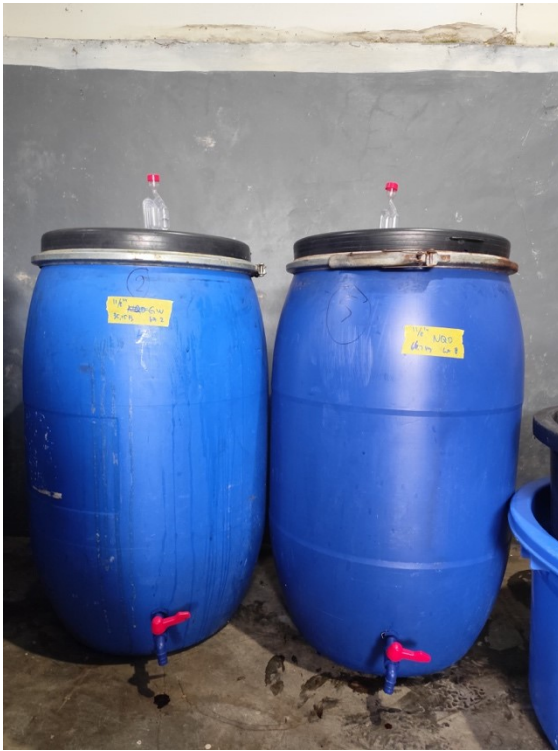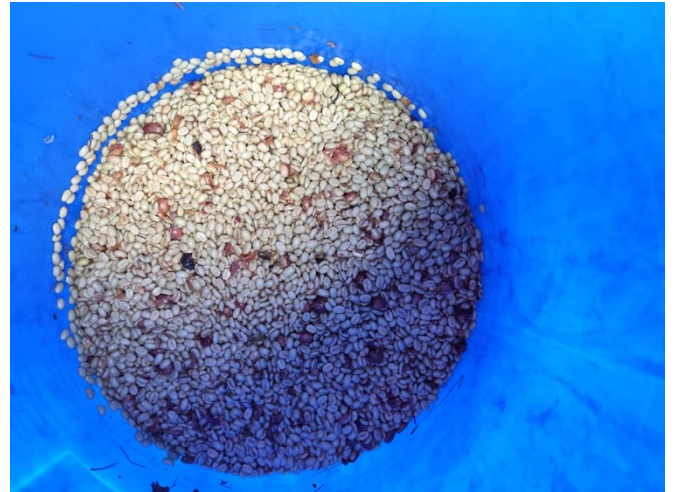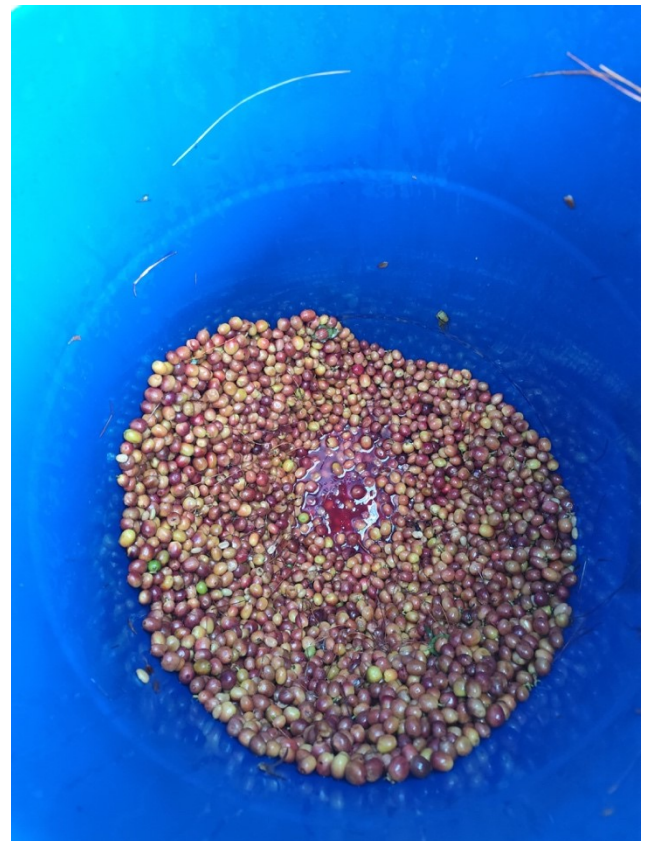

Supplement Figure 3 Self-Induced Anaerobic Fermentation of Pulped (right above) and Whole (right below) Cherries SIAF in the bioreactors (left)



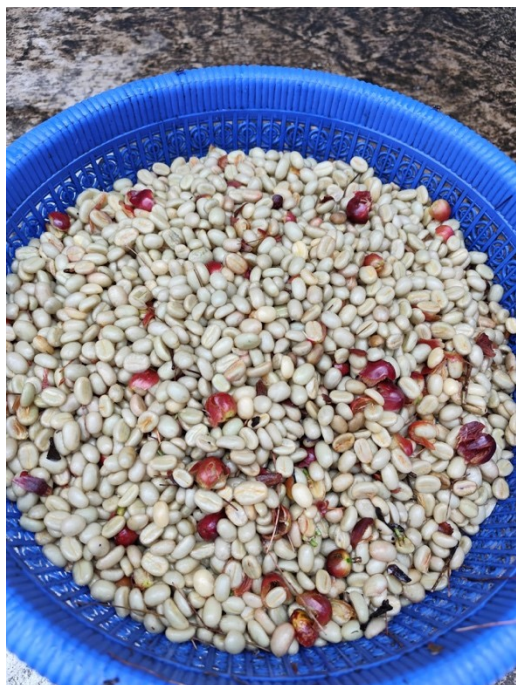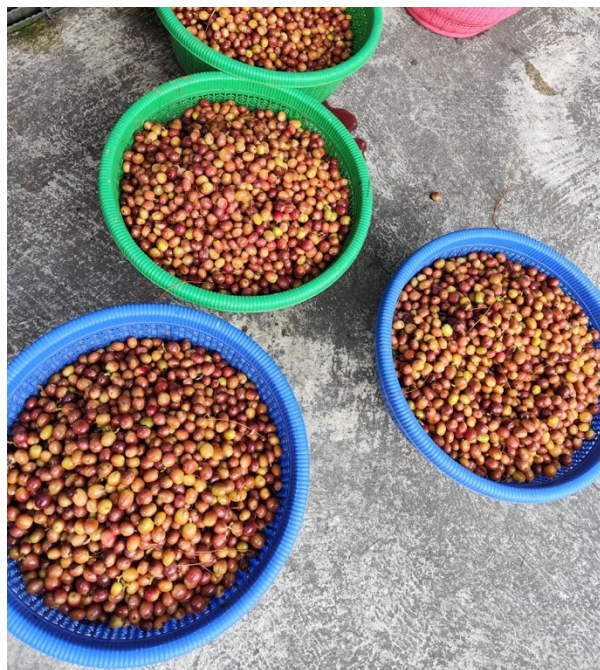

Supplement Figure 4 Pulped (left) and Whole (right) coffee cherries after SIAF

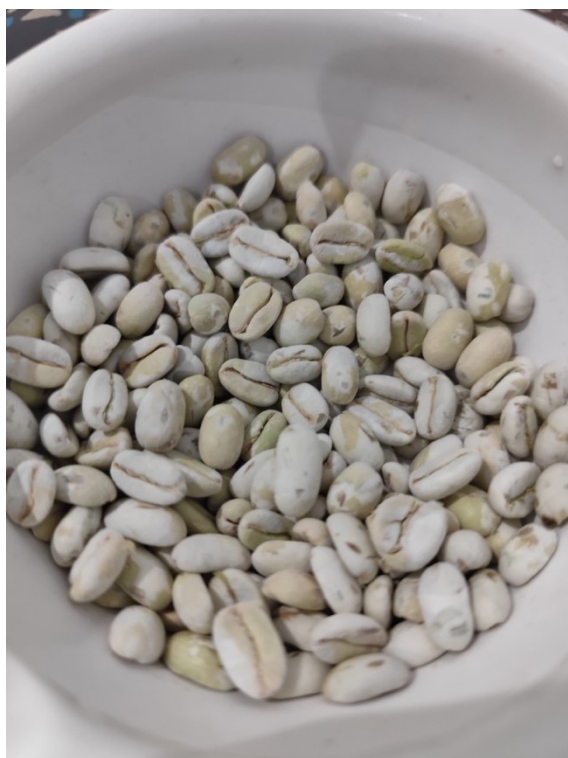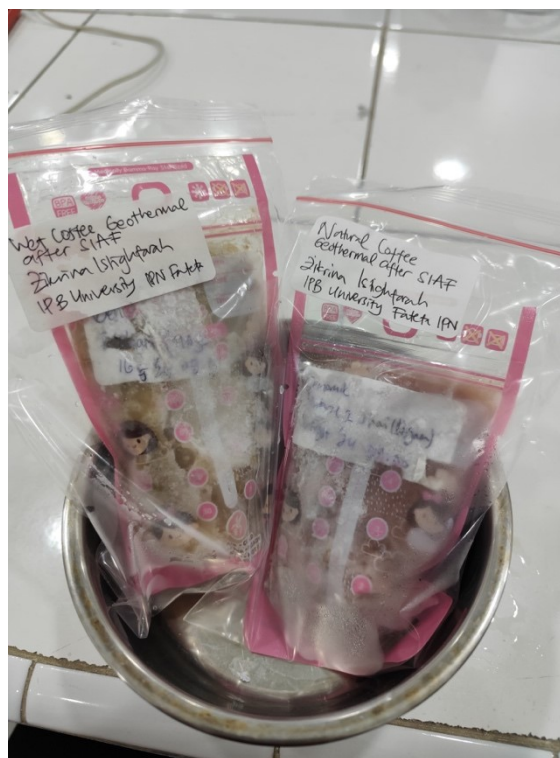

Supplement Figure 5 Nitrogen frozen of green bean sample for chemical analysis (left) and frozen samples of DNA shield submerged green bean for metagenomic analysis (right)
